# Supplementary material for: Development and Genome-level Microevolution of Oral Microbiome during Surface Colonization
Source: Research Square preprint supplement (doi:10.21203/rs.3.rs-8050560/v1), 2025-12-01
Supplement: Supplementary file 1 [file d51bcbdc6b42b9968a287820.pdf]

**Supplementary Materials for**  
**Development and Genome-level Microevolution of Oral Microbiome during**  
**Surface Colonization**

Yuchen Zhang *et al.*

\*Corresponding author. Email: [zhouqin@xjtu.edu.cn](mailto:zhouqin@xjtu.edu.cn); [sadia.niazi@kcl.ac.uk](mailto:sadia.niazi@kcl.ac.uk)

**Table S1. Detailed inclusion and exclusion criteria.**

| Inclusion Criteria                                                    | Exclusion Criteria                                                                                               |
|-----------------------------------------------------------------------|------------------------------------------------------------------------------------------------------------------|
| Single tooth implant restoration.                                     | Presence of progressing periodontitis.                                                                           |
| Age between 20 and 60 years.                                          | Systemic conditions that might affect bone metabolism or wound healing (e.g. diabetes mellitus or osteoporosis). |
| Well-controlled periodontal conditions.                               | Compromised immune conditions.                                                                                   |
| Adhesive-retained all-ceramic single crown restoration.               | History of smoking                                                                                               |
| A minimum of 4 mm width of keratinized mucosa at the edentulous site. | Antibiotic use within the past six months.                                                                       |
|                                                                       | Presence of other dental restorations in the oral cavity.                                                        |
|                                                                       | Pregnancy or lactation.                                                                                          |

**Table S2. Demographic features of the cohort.**

| Demographic Features         | Number of Participants |
|------------------------------|------------------------|
| Age in years (mean $\pm$ SD) | 37.32 $\pm$ 11.22      |
| Gender                       |                        |
| Male (%)                     | 5 (26.32%)             |
| Female (%)                   | 14 (73.68%)            |
| Implant brand                |                        |
| Bego (%)                     | 8 (42.11%)             |
| Straumann (%)                | 6 (31.56%)             |
| Hiossen (%)                  | 3 (15.76%)             |
| Zimmer (%)                   | 1 (5.26%)              |
| Osstem (%)                   | 1 (5.26%)              |
| Ethnicity                    |                        |
| Chinese Han (%)              | 19 (100%)              |

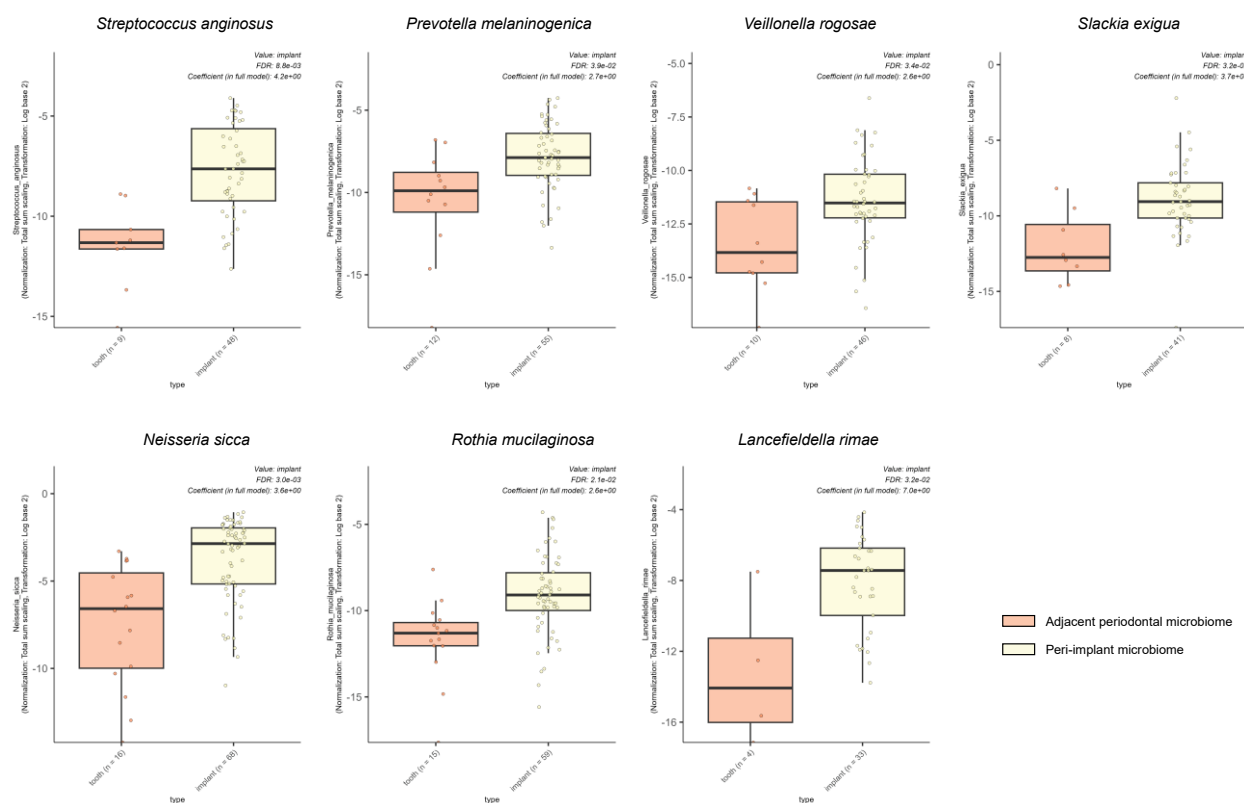

**Fig. S1.**

Linear models showing significantly higher relative abundance of species *Streptococcus anginosus*, *Prevotella melaninogenica*, *Veillonella rogosae*, *Slackia exigua*, *Neisseria sicca*, *Rothia mucilaginosa*, and *Lancefieldella rimae* in the peri-implant microbiome compared to adjacent periodontal microbiome.

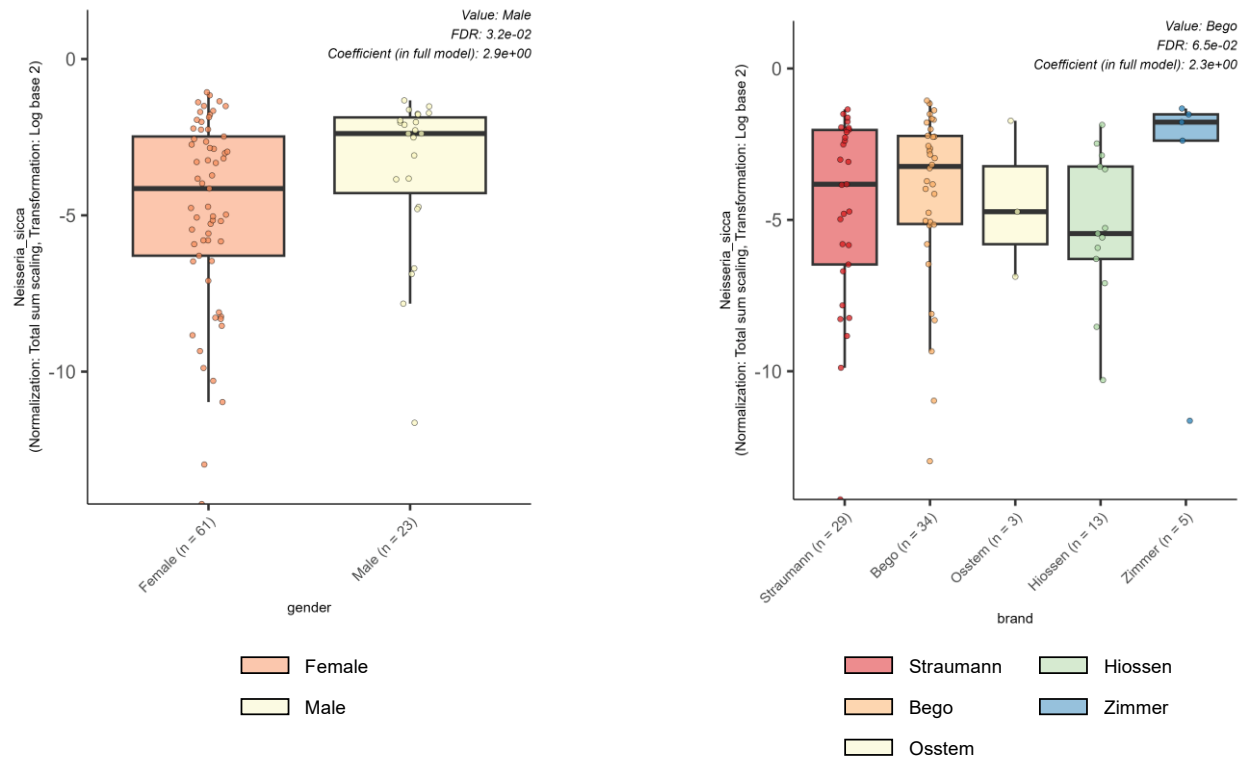

**Fig. S2.**

Regression models showing that *Neisseria sicca* was positively associated with male gender ( $p = 0.032$ ) and Bego brand implants ( $p = 0.065$ ).

### PWY-7883 anhydromuropeptides recycling

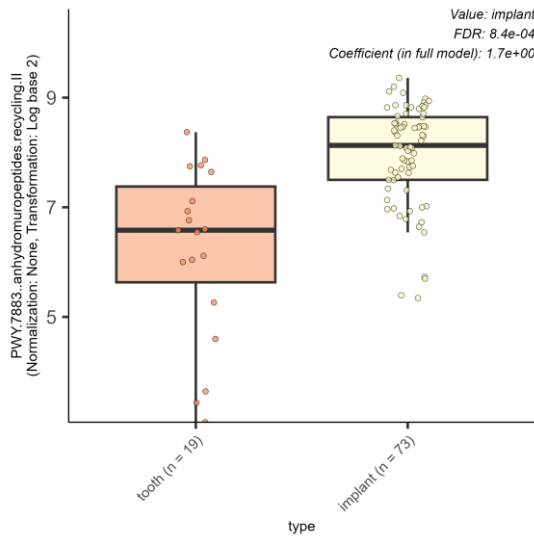

### PWY0-1261 anhydromuropeptides recycling

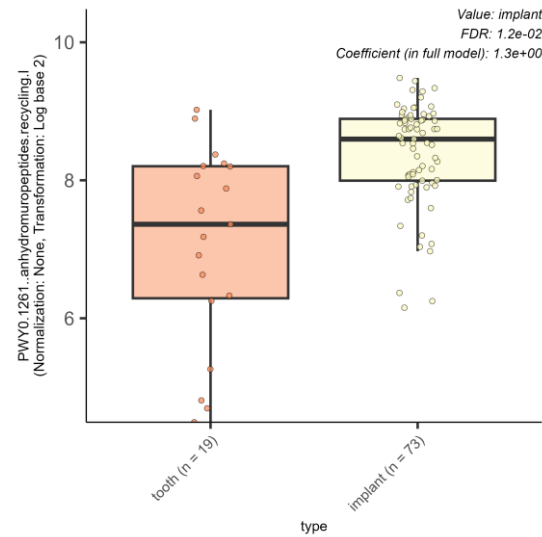

### PWY0-1479 anhydromuropeptides recycling

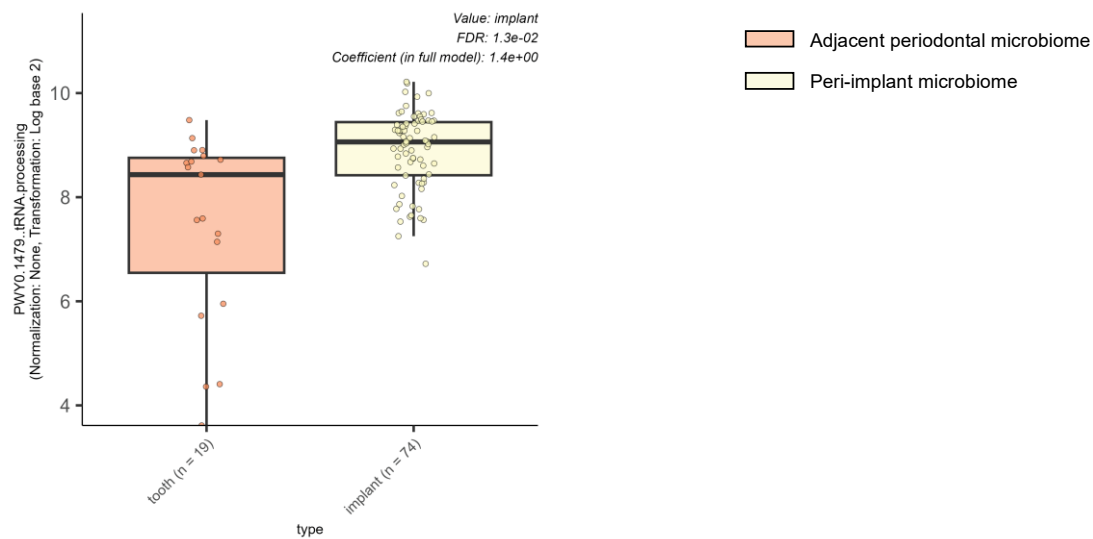

**Fig. S3.**

Linear models showing significantly higher gene abundance related to anhydromuropeptides recycling (PWY-7883 and PWY0-1261) and tRNA processing (PWY0-1479) in the peri-implant microbiome compared to adjacent periodontal microbiome.

### *Prevotella melaninogenica* SGB1547

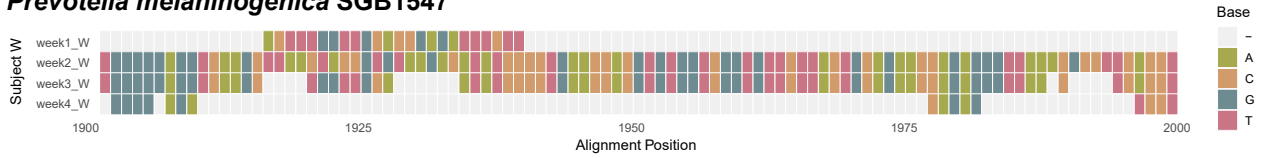

### *Prevotella melaninogenica* SGB1552

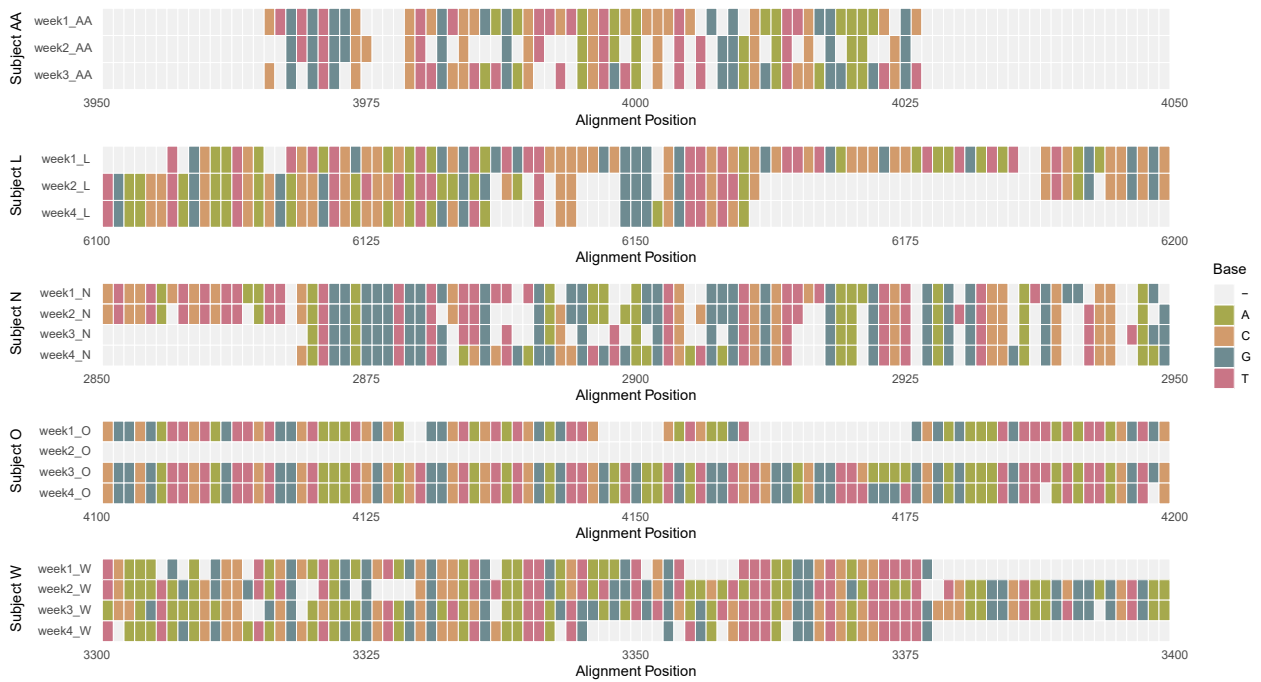

**Fig. S4.**

*StrainPhlan* multiple-alignment visualization of mutation hotspots on consensus marker for *Prevotella melaninogenica* (representative species for pioneer colonizers). For each subject, we identified the 100-bp window with the highest single-nucleotide divergence across weeks 1 to 4 using a sliding window (window = 100 bp, step = 50 bp). Tiles show base calls (A, C, G, T) at each alignment position after excluding gaps and ambiguous bases.

# ***Streptococcus anginosus* SGB8028 group**

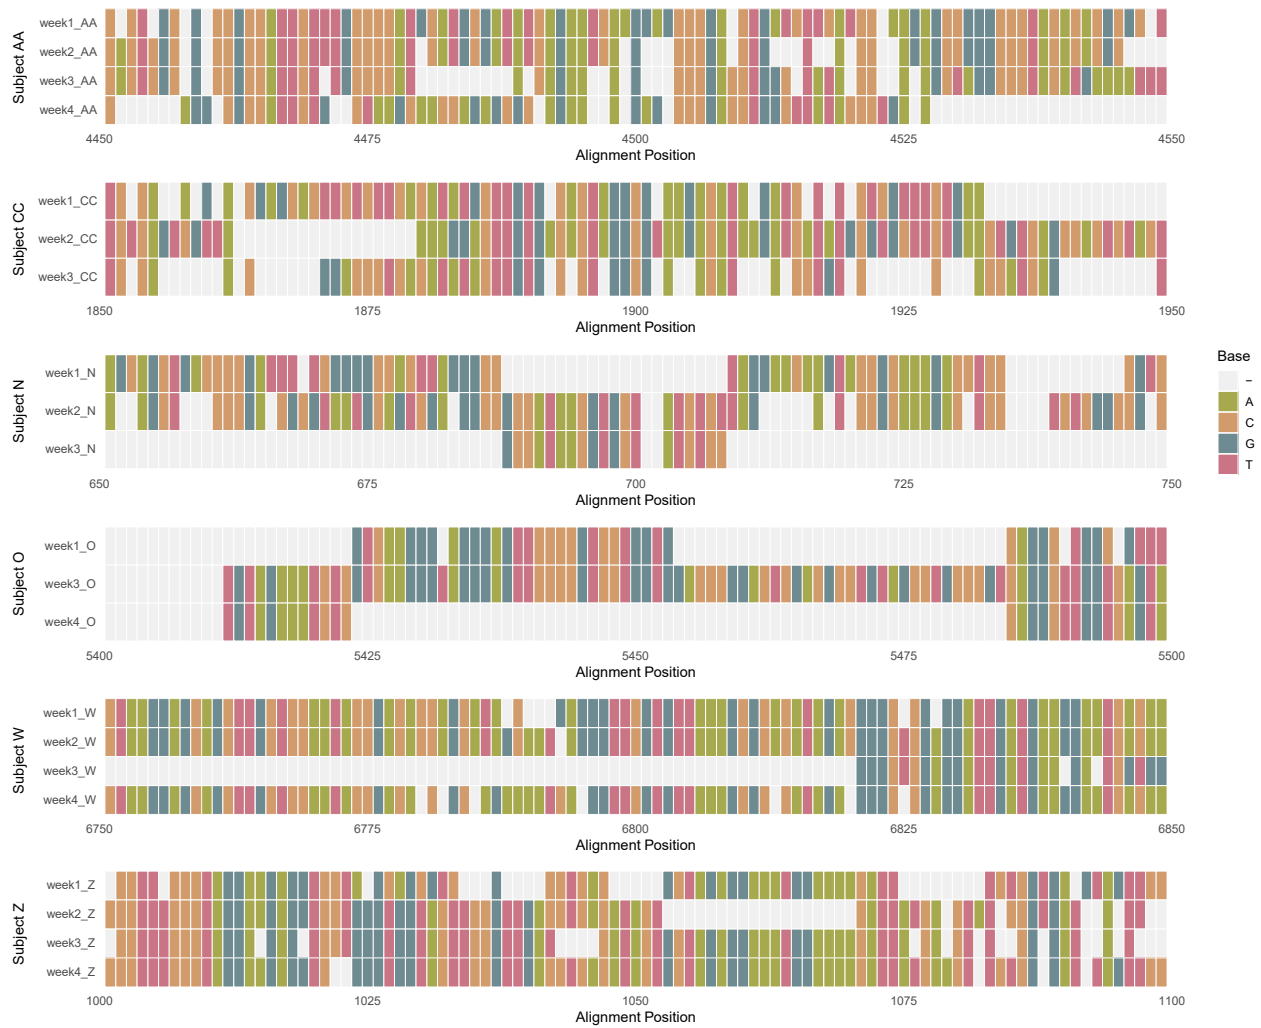

**Fig. S5.**

Multiple-alignment visualization of mutation hotspots on consensus marker for *Streptococcus anginosus* (representative species for pioneer colonizers).



### ***Rothia mucilaginosa* SGB16971 group**

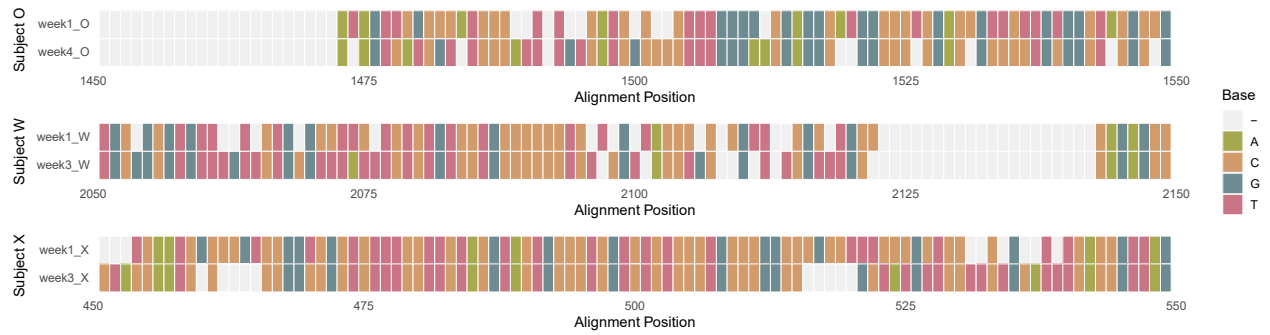

**Fig. S6.**

Multiple-alignment visualization of mutation hotspots on consensus marker for *Rothia mucilaginosa* (representative species for pioneer colonizers).

### *Neisseria sicca* SGB9465 group

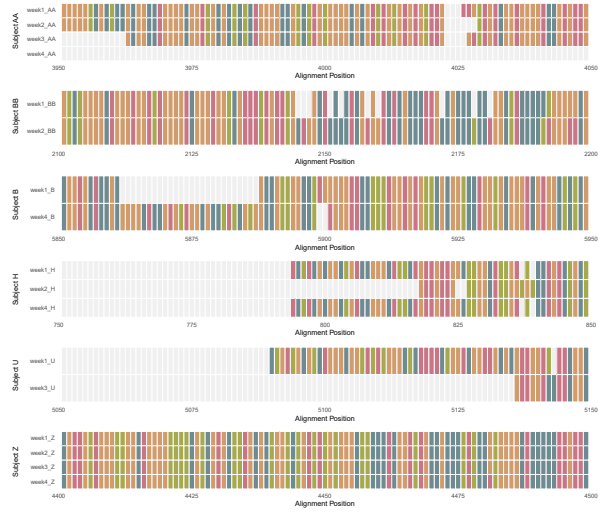

### *Neisseria sicca* SGB9467 group

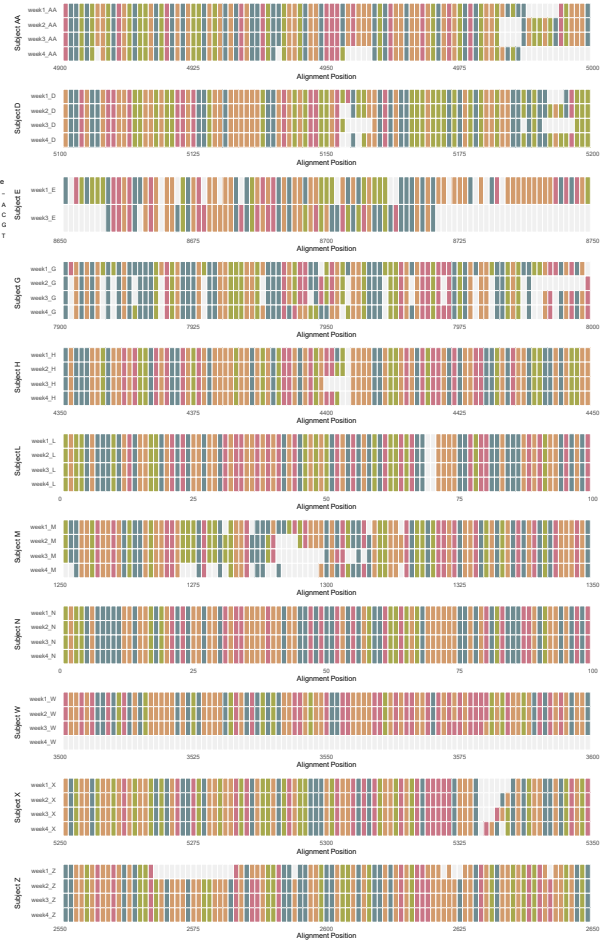

**Fig. S7.**

Multiple-alignment visualization of mutation hotspots on consensus marker for *Neisseria sicca* (representative species for constitutive species).

### ***Slackia exigua* SGB14784**

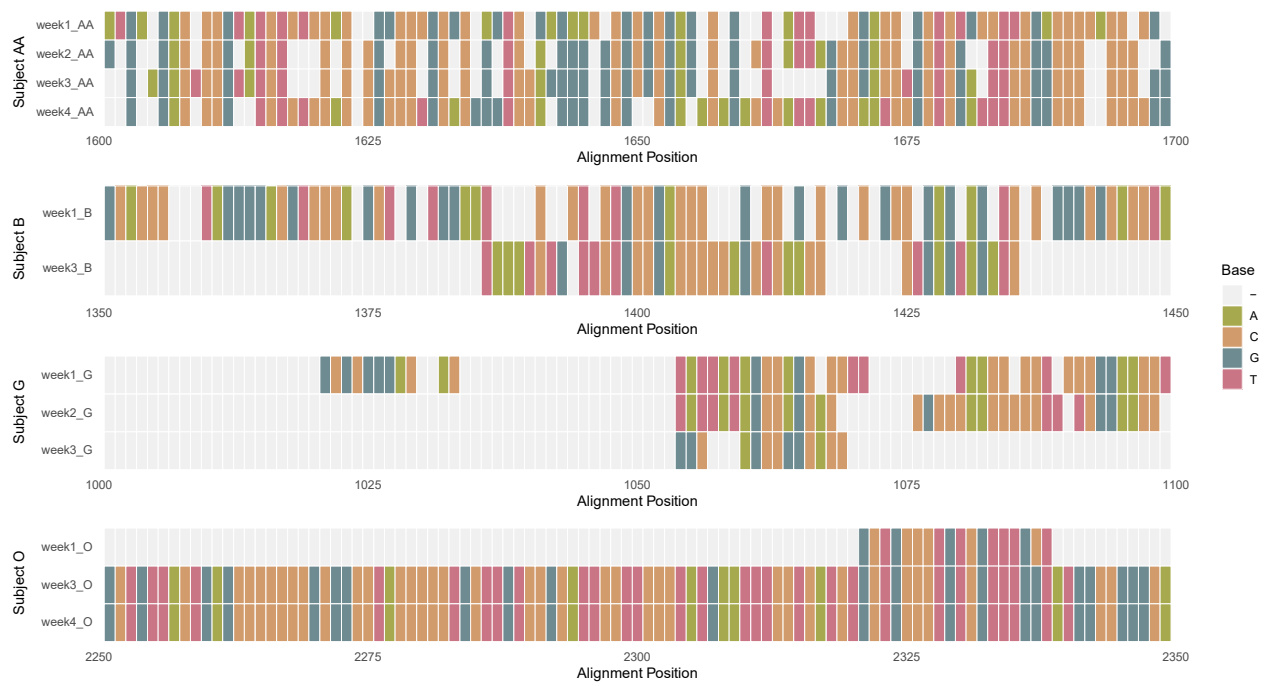

**Fig. S8.**

Multiple-alignment visualization of mutation hotspots on consensus marker for *Slackia exigua* (representative species for late commensals).

### ***Lancefieldella rimae* SGB985**

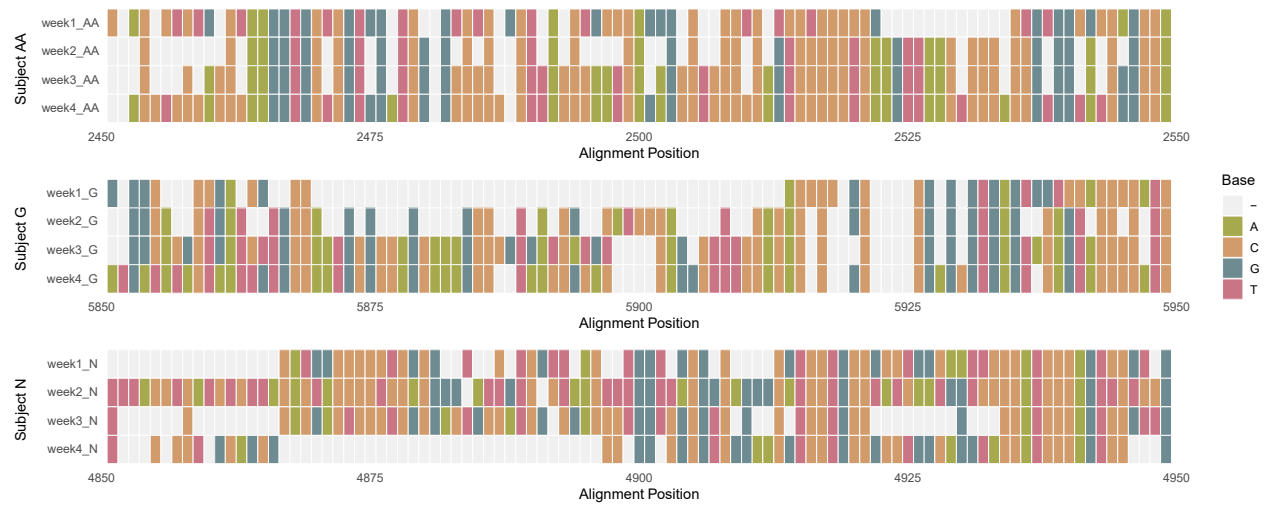

**Fig. S9.**

Multiple-alignment visualization of mutation hotspots on consensus marker for *Lancefieldella rimae* (representative species for late commensals).

**Data S1. (separate file)**

The metadata for each sequenced sample.

**Data S2. (separate file)**

Pathway enrichment or depletion in peri-implant microbiome when compared to the same species in adjacent periodontal microbiome.

**Data S3. (separate file)**

Members of each community module and their relative abundance.

**Data S4. (separate file)**

Top 5 enriched pathways in each module at each time point.

**Data S5. (separate file)**

Spearman correlation coefficients of relative abundances among members within each community module across weeks 1-4 ( $|\rho| > 0.4$  and  $p\text{-FDR} < 0.05$ ).

**Data S6. (separate file)**

Attachment probabilities of late commensal species in the dummy communities P and P + C.

**Data S7. (separate file)**

Counts of the non-synonymous (N) and synonymous (S) SNVs in each community module across the time points, with N/S ratios.
